# Supplementary material
Source: publisher figshare collection journal article supplement (https://karger.figshare.com/articles/dataset/_/11808363)
Supplement: Supplementary file 1 [file 1]

Archive with 2 entries (2 files):
- Supplementary material-Auto_RaFISH_system_supplementary_figure_1.pdf
- Supplementary material-Supplementary_Figure_2.pdf
