# Supplementary material
Source: publisher figshare collection journal article supplement (https://karger.figshare.com/articles/dataset/_/11808363)
Supplement: Supplementary file 1 [file 1 › Supplementary material-Supplementary_Figure_2.pdf]

## Supplementary Figure 2

### Higher-Magnified Image of ALK rearrangement using new Auto-RaFISH.

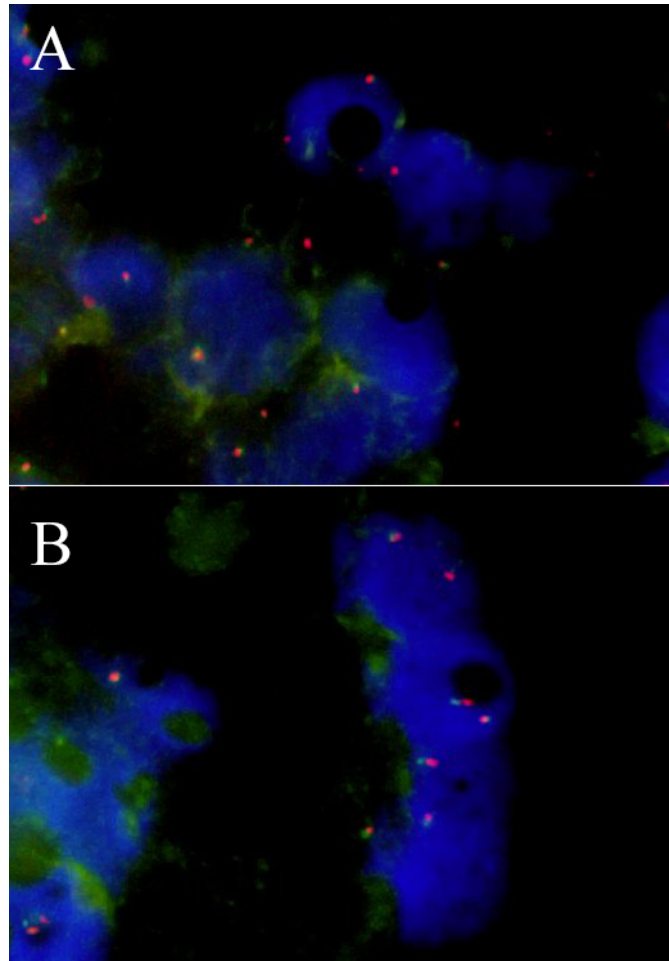

(A) Positive cells

(B) Negative cells

Samples were classified as positive for ALK rearrangement when 15% or more of tumor nuclei showed split signals (red and green signals were separated by  $\geq 2$  signal diameters) or single red signals (3' ALK) were observed in Auto-RaFISH.
