# Supplementary material
Source: publisher figshare collection journal article supplement (https://karger.figshare.com/articles/dataset/_/11808363)

Time series

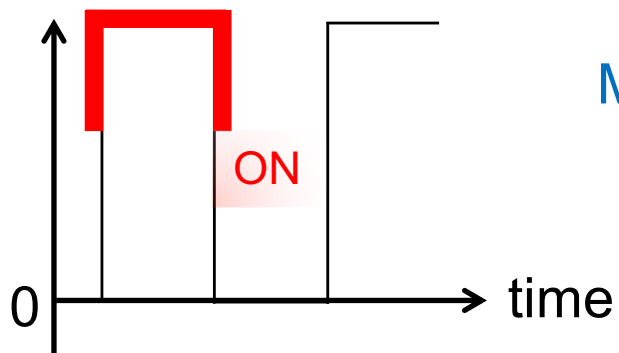

II

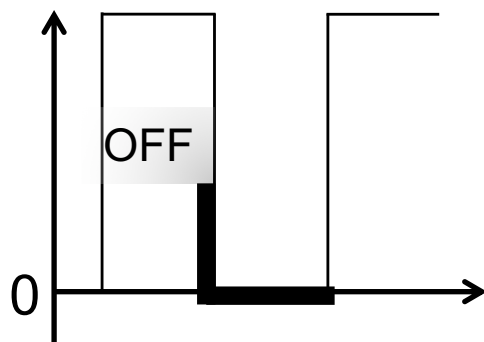

III

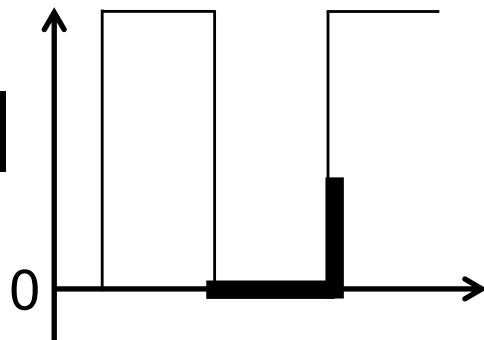

IV

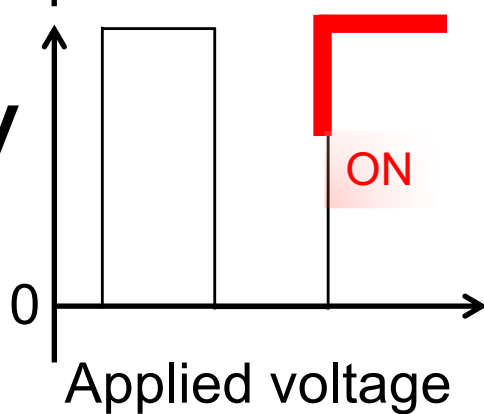

Microdroplet

Reagent  
Target

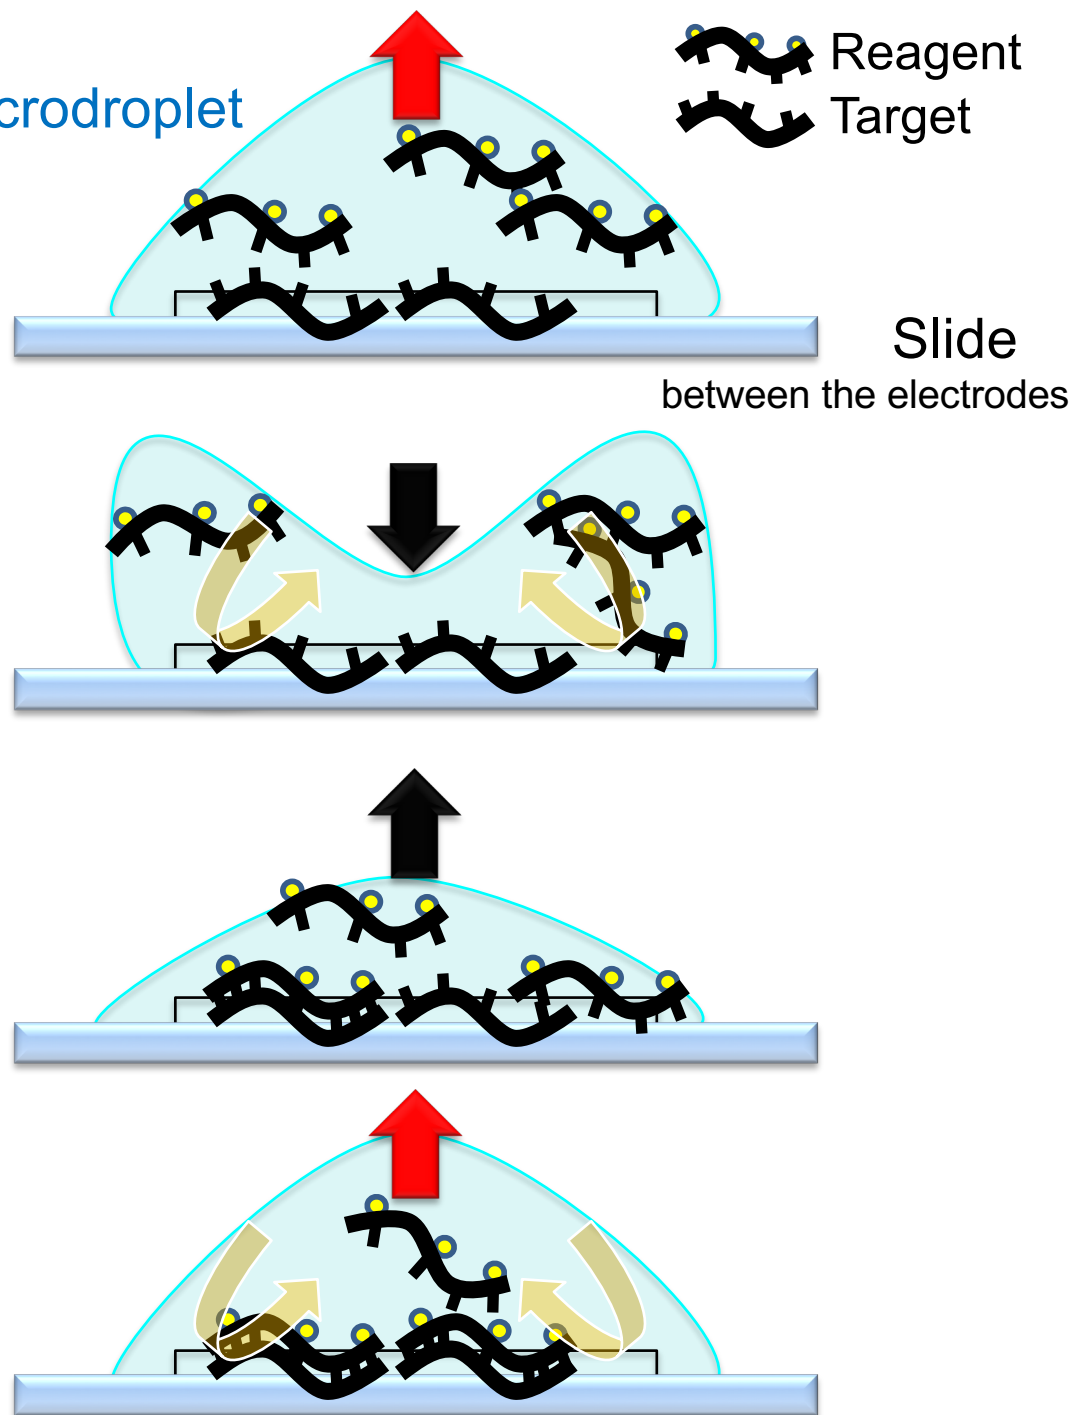

Supplement: Supplementary file 1 [file 1 › Supplementary material-Auto_RaFISH_system_supplementary_figure_1.pdf]
